# Supplementary material for: Measuring the Meltdown: Drivers of Global Amphibian Extinction and Decline
Source: PLoS One. 2008 Feb 20;3(2):e1636. doi: 10.1371/journal.pone.0001636 (PMC2238793; doi:10.1371/journal.pone.0001636)
Supplement: Table S9 — (0.08 MB DOC) [file pone.0001636.s009.doc]

Table S9a. Correlates of amphibian decline risk (full dataset; without spatial autocorrelation). The five most parsimonious generalized linear mixed-effects models investigating (a) life history correlates of decline risk (*n* = 3,045) and (b) environmental context, after accounting for effects of life history correlates (top-ranked ecology/life-history model denoted as ‘lhb’ – life-history base) (*n* = 3,025). Models include nested (hierarchical) taxonomic (Order/Family) random intercepts and geographic distance random slopes to account for spatial autocorrelation. Models were ranked according to the Bayesian Information Criterion (BIC). For ecology/life history models, the five most highly BIC-ranked models accounted for > 99 % of the posterior model weight (*w*BIC) of the total of 40 models considered. For environmental context, model weights were more evenly distributed among the 5 most highly ranked of the 75 models considered. Terms shown are RG = *range* (km2), BS = *body size*, HB = *habit* , RC = *reproductive cycle*, RS = *reproductive strategy*, PC = *presence/absence of parental care*, SS = *spawning site* and FT = *fertilization type*, TM = *mean temperature*, PV = *precipitation range*, PM = *mean precipitation*, TV = *temperature range*, HL = *% habitat lost*, HD = *human density* (people/km2). Also shown are number of parameters (*k*), maximised log-likelihood (*LL*), difference in BICfor each model from the most parsimonious model (BIC), model weight (*w*BIC), percent deviance explained (%DE) in the response variable (decline probability) by the model under consideration, and the difference between the %DE for the current environmental context model and the life history base (lhb) model (%DE).

| Model | *k* | *LL* | BIC | *w*BIC | %DE | %DE |
| --- | --- | --- | --- | --- | --- | --- |
|  |  |  |  |  |  |  |
| (a) Ecology/life-history |  |  |  |  |  |  |
| BS+RG+RG2+HB+SS+RC+RS+PC+FT | 19 | -1608.657 | 0.000 | 0.997 | 17.02 |  |
| BS+RG+RG2 | 7 | -1652.609 | 12.976 | 0.002 | 14.75 |  |
| RG+RG2 | 6 | -1655.973 | 13.423 | <0.001 | 14.58 |  |
| BS+RG+HB+RC+RS | 12 | -1652.936 | 45.186 | <0.001 | 14.73 |  |
| BS+RG+HB+RS | 11 | -1657.014 | 47.063 | <0.001 | 14.53 |  |
|  |  |  |  |  |  |  |
| (b) Environmental context |  |  |  |  |  |  |
| lhb…+TM+PV+HL | 22 | -1530.959 | 0.000 | 0.863 | 20.48 | 3.46 |
| lhb…+TM+PV+HL+HD | 23 | -1530.166 | 4.604 | 0.086 | 20.52 | 3.50 |
| lhb…+TM+TV+PV+HL | 23 | -1530.957 | 6.200 | 0.039 | 20.48 | 3.46 |
| lhb…+PV+HL | 21 | -1539.131 | 10.264 | 0.005 | 20.06 | 3.44 |
| lhb…+TM+TV+PV+HL+HD | 24 | -1530.161 | 10.800 | 0.004 | 20.52 | 3.50 |

Table S9b. Correlates of amphibian decline risk (full dataset; with spatial autocorrelation). The five most parsimonious generalized linear mixed-effects models investigating (a) life history correlates of decline risk (*n* = 3,045) and (b) environmental context, after accounting for effects of life history correlates (top-ranked ecology/life-history model denoted as ‘lhb’ – life-history base) (*n* = 3,025). Models include nested (hierarchical) taxonomic (Order/Family) random intercepts and geographic distance random slopes to account for spatial autocorrelation. Models were ranked according to the Bayesian Information Criterion (BIC). For ecology/life history models, the five most highly BIC-ranked models accounted for > 99 % of the posterior model weight (*w*BIC) of the total of 40 models considered. For environmental context, model weights were more evenly distributed among the 5 most highly ranked of the 75 models considered. Terms shown are RG = *range* (km2), BS = *body size*, HB = *habit* , RC = *reproductive cycle*, RS = *reproductive strategy*, PC = *presence/absence of parental care*, SS = *spawning site* and FT = *fertilization type*, TM = *mean temperature*, PV = *precipitation range*, PM = *mean precipitation*, TV = *temperature range*, HL = *% habitat lost*, HD = *human density* (people/km2). Also shown are number of parameters (*k*), maximised log-likelihood (*LL*), difference in BICfor each model from the most parsimonious model (BIC), model weight (*w*BIC), percent deviance explained (%DE) in the response variable (decline probability) by the model under consideration, and the difference between the %DE for the current environmental context model and the life history base (lhb) model (%DE).

| Model | *k* | *LL* | BIC | *w*BIC | %DE | %DE |
| --- | --- | --- | --- | --- | --- | --- |
|  |  |  |  |  |  |  |
| (a) Ecology/life-history |  |  |  |  |  |  |
| BS+RG+RG2+HB+SS+RC+RS+PC+FT | 21 | -1598.536 | 0.000 | 0.951 | 17.01 |  |
| RG+RG2 | 8 | -1642.173 | 6.314 | 0.040 | 14.75 |  |
| BS+RG+RG2 | 9 | -1640.552 | 9.346 | 0.009 | 14.83 |  |
| BS+RG+HB+RC+RS | 14 | -1644.806 | 49.419 | <0.001 | 14.61 |  |
| BS+RG+HB+RC | 12 | -1654.167 | 55.633 | <0.001 | 14.13 |  |
|  |  |  |  |  |  |  |
| (b) Environmental context |  |  |  |  |  |  |
| lhb…+TM+PV+HL | 24 | -1525.251 | 0.000 | 0.863 | 20.26 | 3.25 |
| lhb…+TM+TV+PV+HL | 25 | -1525.143 | 5.954 | 0.086 | 20.26 | 3.25 |
| lhb…+TM+PM+PV+HL | 25 | -1526.291 | 8.083 | 0.039 | 20.20 | 3.19 |
| lhb…+PM+PV+HL | 24 | -1531.849 | 13.502 | 0.005 | 19.91 | 2.90 |
| lhb…+TV+PV+HL+HD | 25 | -1530.015 | 15.776 | 0.004 | 20.01 | 3.00 |
